# Supplementary material for: Small molecules based on 2,7-carbazole for efficient solution-processed organic solar cells
Source: Royal Society of Chemistry journal article supplement (doi:10.1039/c3ta11168g), 2013-01-01
Supplement: c3ta11168g.pdf [file c3ta11168g.pdf]

Electronic Supplementary Information for:

## Small Molecules Based on 2,7-Carbazole for Efficient Solution-Processed Organic Solar Cells

Pengcheng Li,<sup>a,b</sup> Hui Tong,<sup>\*a</sup> Junqiao Ding,<sup>a</sup> Zhiyuan Xie,<sup>a</sup> and Lixiang Wang<sup>\*a</sup>

<sup>a</sup> State Key Laboratory of Polymer Physics and Chemistry, Changchun Institute of Applied Chemistry, Chinese Academy of Sciences, Changchun 130022, P. R. China. Fax: 86-431-85684937; Tel: 86-431-85262108; E-mail: [chentonghui@ciac.jl.cn](mailto:chentonghui@ciac.jl.cn); [lixiang@ciac.jl.cn](mailto:lixiang@ciac.jl.cn)

<sup>b</sup> University of the Chinese Academy of Sciences, Beijing 100049, P. R. China.

### X-ray diffraction

The crystallinity of the active layer was analyzed using Grazing incidence wide-angle x-ray diffraction (GIWAXD) measurements. All the films were spin-coated from chlorobenzene solution on glass substrates. All measurements were performed with the diffractometer D8 Discover (Bruker, Germany) ( $\lambda = 1.54 \text{ \AA}$ ). A fixed grazing incidence angle of  $0.2^\circ$  was used to reduce the scattering from substrates.

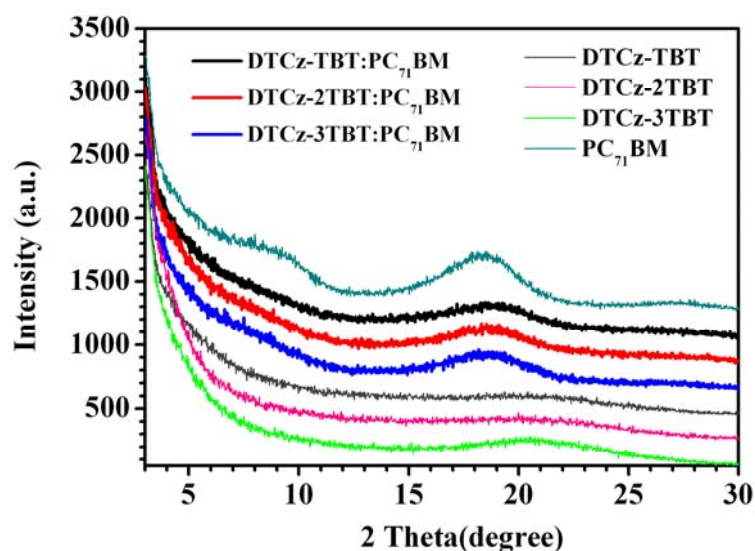

**Figure S1.** XRD diffraction patterns of films of DTCz-TBT, DTCz-2TBT, DTCz-3TBT, PC<sub>71</sub>BM, DTCz-TBT:PC<sub>71</sub>BM(1:2), DTCz-2TBT:PC<sub>71</sub>BM(1:2), DTCz-3TBT:PC<sub>71</sub>BM(1:2)

As shown in Figure S1, no clear reflection peak was observed for all the pristine films of the three molecules. The blended films only exhibited the weak diffraction pattern of PC<sub>71</sub>BM.

### Thermal Stability of the Devices

To examine the thermal stability of the devices, device performances obtained from DTCz-TBT/PC<sub>71</sub>BM, DTCz-TBT/PC<sub>71</sub>BM and DTCz-TBT/PC<sub>71</sub>BM under the optimized conditions after post-production annealing at 80 °C for 0.5–12 h were compared. Related data were summarized in Figure S2 and Table S1.

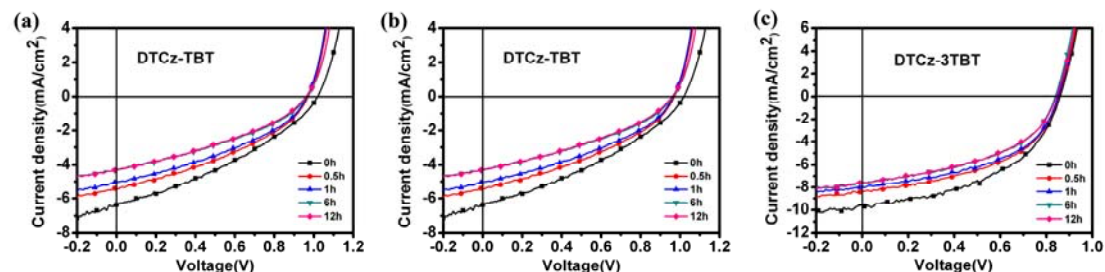

**Figure S2.** Current density-voltage ( $J$ - $V$ ) curves of devices processed from DTCz-TBT/PC<sub>71</sub>BM(a), DTCz-TBT/PC<sub>71</sub>BM(b) and DTCz-TBT/PC<sub>71</sub>BM(c), during annealing at 80 °C for different time.

**Table S1** photovoltaic performance with different thermal annealing time at 80 °C for devices based on compounds **DTCz-TBT**, **DTCz-2TBT** and **DTCz-3TBT**

| Donor            | Annealing time | $V_{oc}$ (V) | $J_{sc}$ (mA/cm <sup>2</sup> ) | FF   | PCE   | PCE decay ratio |
|------------------|----------------|--------------|--------------------------------|------|-------|-----------------|
| <b>DTCz-TBT</b>  | 0h             | 1.02         | 6.36                           | 0.35 | 2.26% |                 |
|                  | 0.5h           | 0.97         | 5.41                           | 0.37 | 1.96% | 13%             |
|                  | 1h             | 0.97         | 5.05                           | 0.37 | 1.83% | 19%             |
|                  | 6h             | 0.97         | 4.28                           | 0.37 | 1.52% | 33%             |
|                  | 12h            | 0.96         | 4.24                           | 0.36 | 1.48% | 35%             |
| <b>DTCz-2TBT</b> | 0h             | 0.93         | 8.31                           | 0.45 | 3.48% |                 |
|                  | 0.5h           | 0.91         | 7.50                           | 0.44 | 2.97% | 15%             |
|                  | 1h             | 0.92         | 7.35                           | 0.42 | 2.84% | 18%             |
|                  | 6h             | 0.89         | 5.82                           | 0.43 | 2.23% | 36%             |
|                  | 12h            | 0.89         | 5.80                           | 0.43 | 2.21% | 36%             |
| <b>DTCz-3TBT</b> | 0h             | 0.86         | 9.59                           | 0.48 | 3.94% |                 |
|                  | 0.5h           | 0.85         | 8.36                           | 0.49 | 3.45% | 12%             |
|                  | 1h             | 0.85         | 7.90                           | 0.50 | 3.33% | 15%             |
|                  | 6h             | 0.84         | 7.64                           | 0.47 | 3.00% | 24%             |
|                  | 12h            | 0.85         | 7.59                           | 0.46 | 2.96% | 25%             |
